# Supplementary material for: Photoelectric properties of the layered raspberry sandwich amorphous ZnCo2S4@MnCo2S4/CP composite counter electrode in semiconductor-sensitized solar cells
Source: Royal Society of Chemistry journal article supplement (doi:10.1039/d2dt03355k), 2023-01-01
Supplement: d2dt03355k1.pdf [file d2dt03355k1.pdf]

## Supporting Information

### **Photoelectric properties of layered raspberry sandwich amorphous ZnCo<sub>2</sub>S<sub>4</sub>@MnCo<sub>2</sub>S<sub>4</sub>/CP composite counter electrode in semiconductor-sensitized solar cells**

Mingzhu Liu<sup>a</sup>, Senyang Wang<sup>a</sup>, Ying Cao<sup>a</sup>, Chengyang Liang<sup>a</sup>, Shitong Geng<sup>a</sup>, Haipeng Guo<sup>b</sup>, Ying Liu<sup>c</sup>, Yanhong Luo<sup>d</sup>, Wenming Zhang<sup>a\*</sup>, Ling Li<sup>a\*</sup>

<sup>a</sup> Hebei Key Lab of Optic-electronic Information and Materials, College of Physics Science and Technology, Hebei Provincial Photovoltaic Technology Collaborative Innovation Center, Institute of Life Science and Green Development, Hebei University, Baoding 071002, P. R. China

<sup>b</sup> Fengfan Co. Ltd, Baoding 071000, Hebei, China

<sup>c</sup> State Key Laboratory of Photovoltaic Materials & Technology, Yingli Solar, Baoding 071051, China

<sup>d</sup> Beijing National Laboratory for Condensed Matter Physics, Institute of Physics, Chinese Academy of Sciences, Beijing 100190, P. R. China.

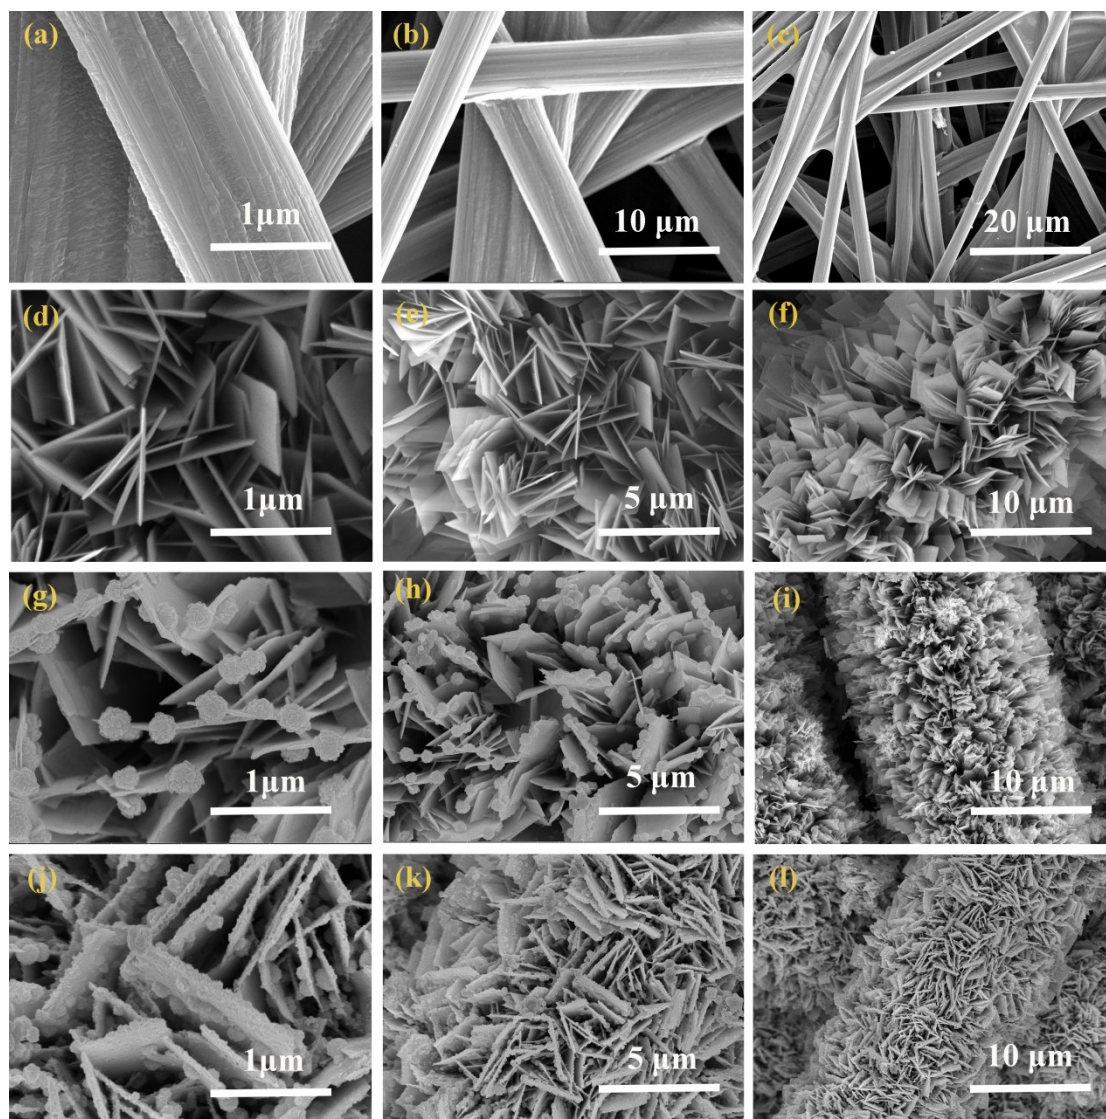

**Figure S1** SEM images at different magnifications of CP, ZC-LDH/CP, ZC-LDH@MC-LDH/CP and ZCS@MCS/CP.

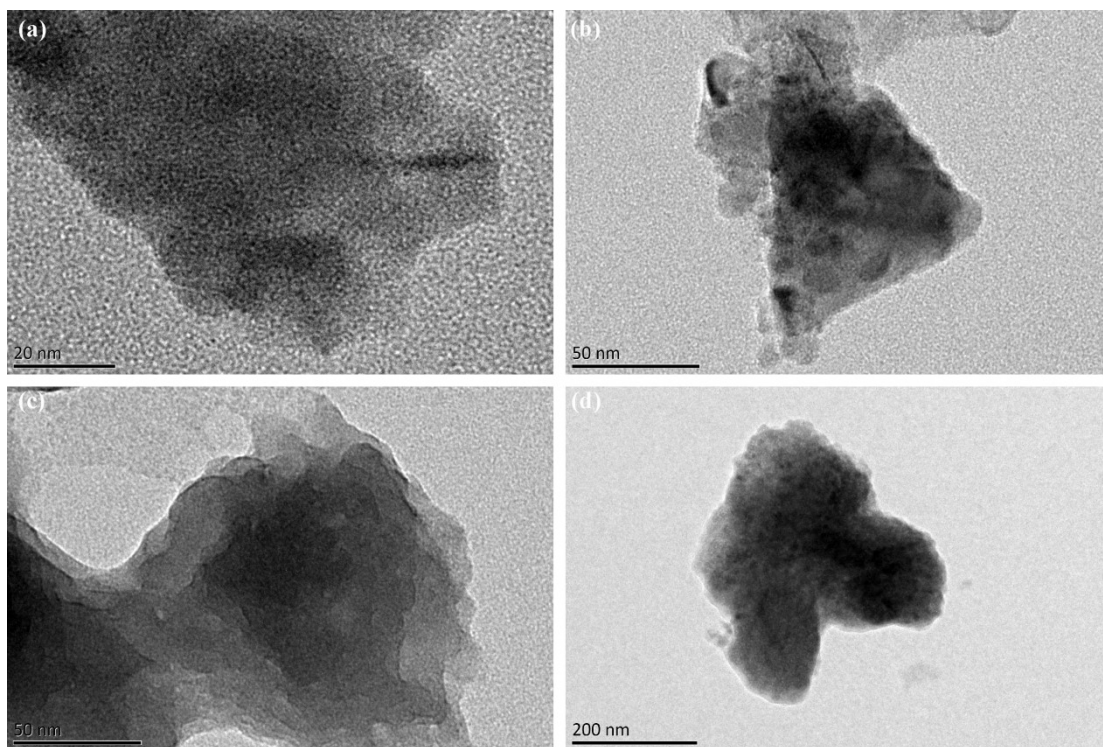

**Figure S2** HRTEM plots of ZCS@MCS/CP at different magnifications.

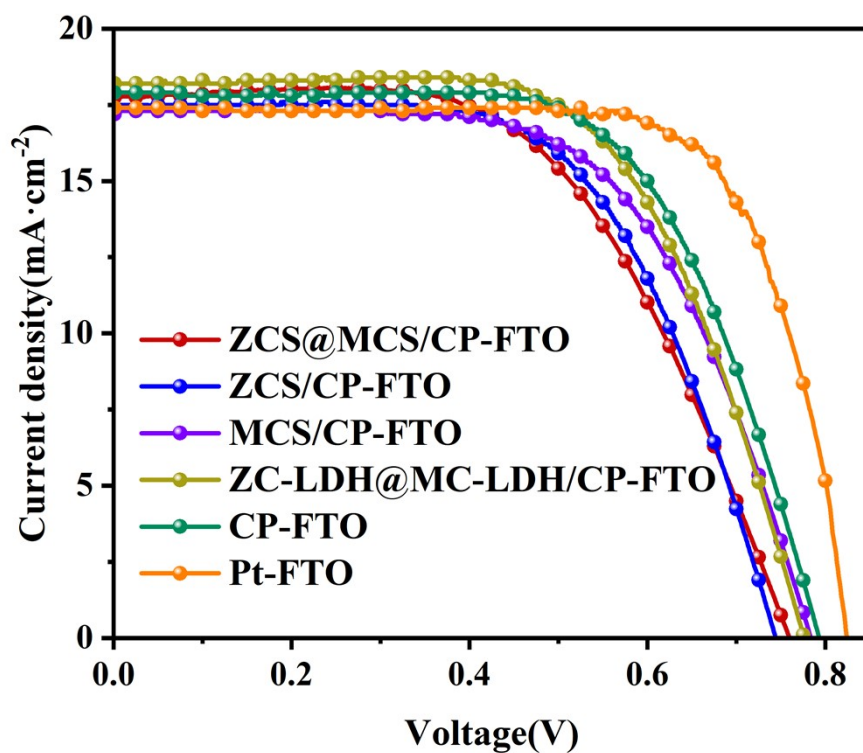

Figure S3 J-V curve of conductive glass substrate of each composite.

Table S1 J-V curve test data of conductive glass substrate of each composite material.

| CEs              | $V_{oc}(V)$ | $J_{sc}(mA \cdot cm^{-2})$ | FF        | PCE(%) |
|------------------|-------------|----------------------------|-----------|--------|
| ZCS@MCS/CP-FTO   | 0.824±0.22  | 17.44±0.12                 | 0.74±0.10 | 10.60  |
| ZCS/CP-FTO       | 0.791±0.12  | 17.93±0.16                 | 0.64±0.08 | 9.13   |
| MCS/CP-FTO       | 0.776±0.11  | 18.17±0.14                 | 0.64±0.07 | 8.99   |
| ZC@MC-LDH/CP-FTO | 0.784±0.16  | 17.25±0.18                 | 0.63±0.07 | 8.37   |
| CP-FTO           | 0.745±0.08  | 17.42±0.11                 | 0.62±0.03 | 7.99   |
| Pt-FTO           | 0.760       | 17.74±0.21                 | 0.57      | 7.71   |
